# Supplementary material
Source: Springer Nature journal article supplement (https://www.springermedizin.de/resource/supplementary/12955_2007_387_MOESM1_ESM.pdf/9560294)

● Role Restriction, Placebo    ■ Role Restriction, TPM 100 mg/d

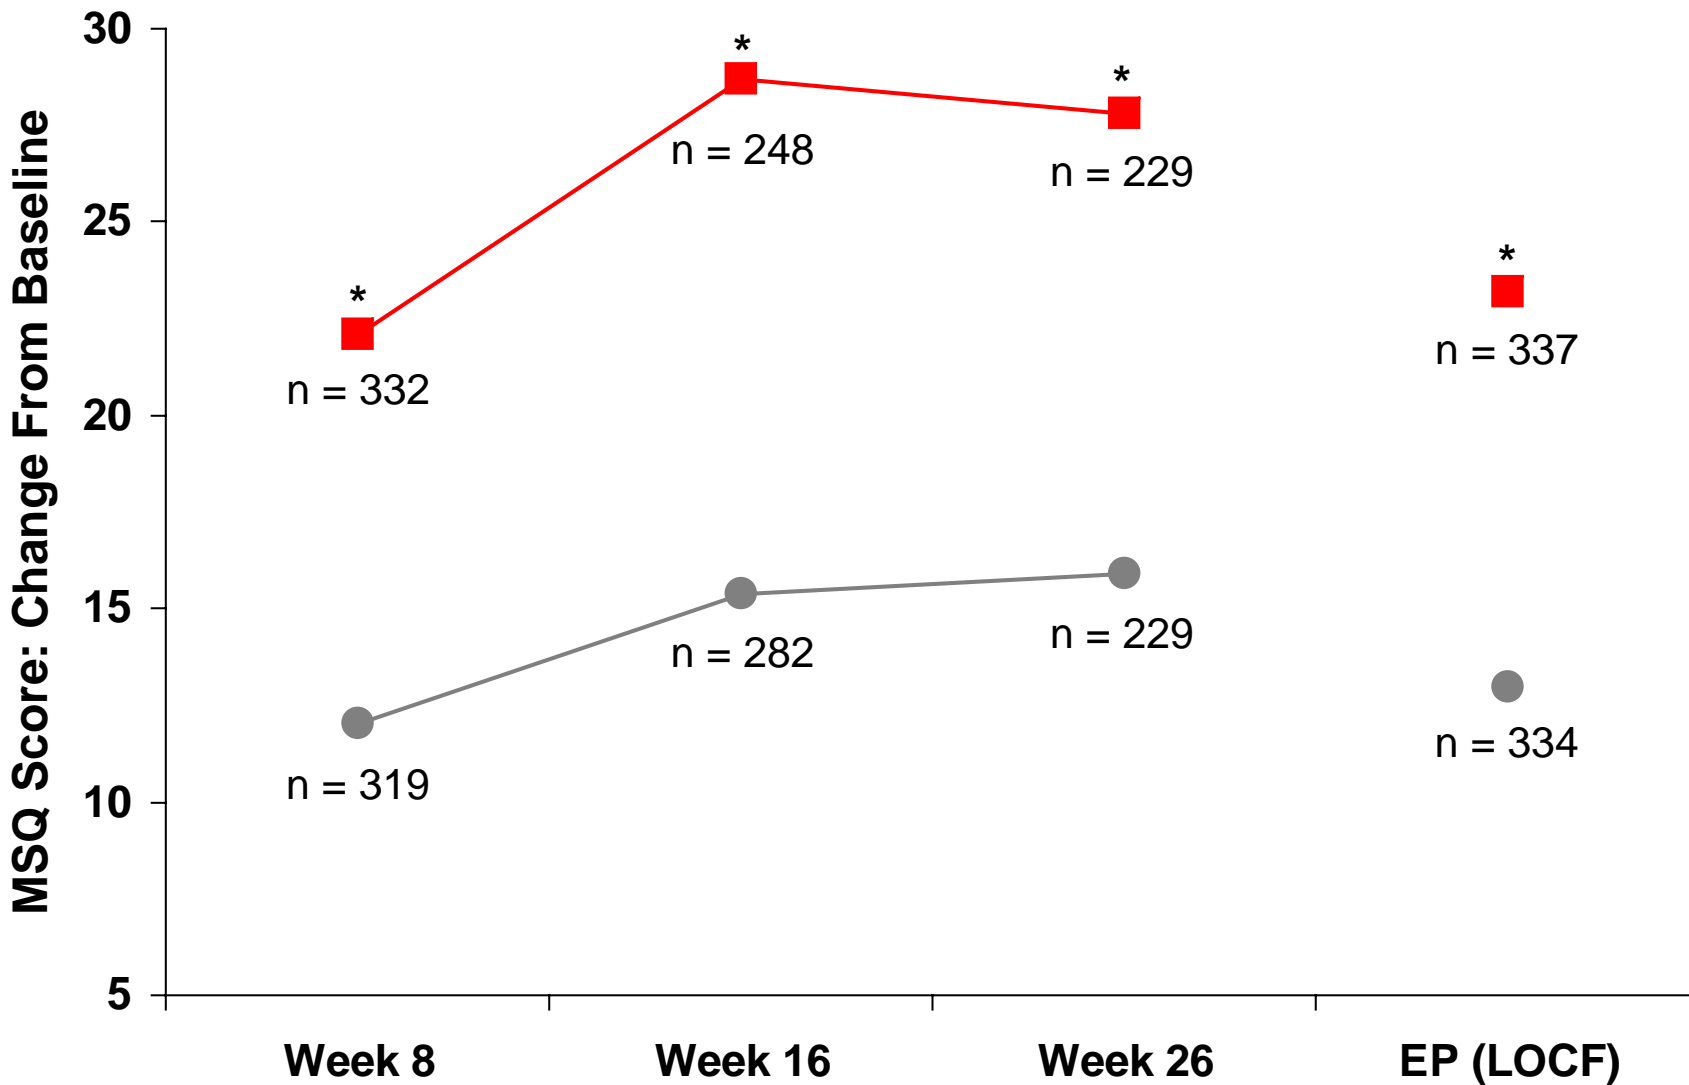

Supplement: MOESM1 [file 9560294]
